# Supplementary material for: Low band-gap conjugated polymer based on diketopyrrolopyrrole units and its application in organic photovoltaic cells
Source: Royal Society of Chemistry journal article supplement (doi:10.1039/c7ta01250k), 2017-01-01
Supplement: c7ta01250k1.pdf [file c7ta01250k1.pdf]

## **Supporting Information**

### **Low Band-gap Conjugated Polymer based on Diketopyrrolopyrrole**

### **Units and its Application in Organic Photovoltaic**

*Hao Zhang, Shaoqing Zhang, Ke Gao, Feng Liu\*, Hui Feng Yao, Bei Yang, Chang He, Thomas P. Russell, Jianhui Hou\**

**Table S1.** The optimization of D/A weight ratio of the P266: PC<sub>71</sub>BM-based PSCs<sup>a</sup>

| <b>D/A</b>   | <b><math>V_{oc}</math> (V)</b> | <b><math>J_{sc}</math> (mA/cm<sup>2</sup>)</b> | <b>FF</b> | <b>PCE (%)</b> |
|--------------|--------------------------------|------------------------------------------------|-----------|----------------|
| <b>1:1</b>   | 0.734                          | 15.85                                          | 0.557     | 6.48           |
| <b>1:1.5</b> | 0.712                          | 16.66                                          | 0.606     | 7.18           |
| <b>1:2</b>   | 0.705                          | 16.02                                          | 0.646     | 7.30           |
| <b>1:3</b>   | 0.711                          | 14.35                                          | 0.672     | 6.85           |

a) 3% vol. DPE was used as additive here because that the primary PCE acquired from CB is too low. The results were acquired from the conventional method.

**Table S2.** The optimization of additive feed ratio of the P266: PC<sub>71</sub>BM-based PSCs<sup>a</sup>

| <b>DPE (%)</b> | <b><math>V_{oc}</math> (V)</b> | <b><math>J_{sc}</math> (mA/cm<sup>2</sup>)</b> | <b>FF</b> | <b>PCE (%)</b> |
|----------------|--------------------------------|------------------------------------------------|-----------|----------------|
| <b>1</b>       | 0.731                          | 6.87                                           | 0.584     | 2.87           |
| <b>3</b>       | 0.711                          | 16.60                                          | 0.639     | 7.54           |
| <b>5</b>       | 0.693                          | 17.14                                          | 0.598     | 7.10           |

a) The D/A weight ratio adopted here is 1:2. The results were acquired from the conventional method.

**Table S3.** Photovoltaic Characteristics of P266/PC<sub>71</sub>BM-based PSC Devices with different film thickness.

| <b>Film Thickness(nm)</b> | <b><math>V_{oc}</math> (V)</b> | <b><math>J_{sc}</math> (mA/cm<sup>2</sup>)</b> | <b>FF</b> | <b>PCE (%)</b> |
|---------------------------|--------------------------------|------------------------------------------------|-----------|----------------|
| 340                       | 0.69                           | 21.08                                          | 0.519     | 7.60           |
| 305                       | 0.69                           | 21.32                                          | 0.562     | 8.28           |
| 270                       | 0.69                           | 20.25                                          | 0.599     | 8.42           |
| 250                       | 0.69                           | 19.65                                          | 0.612     | 8.35           |
| 230                       | 0.69                           | 19.24                                          | 0.630     | 8.41           |
| 210                       | 0.70                           | 18.10                                          | 0.657     | 8.32           |

|     |      |       |       |      |
|-----|------|-------|-------|------|
| 180 | 0.70 | 17.58 | 0.669 | 8.20 |
| 160 | 0.71 | 17.63 | 0.699 | 8.72 |
| 130 | 0.71 | 17.54 | 0.701 | 8.76 |
| 100 | 0.72 | 17.30 | 0.716 | 8.92 |

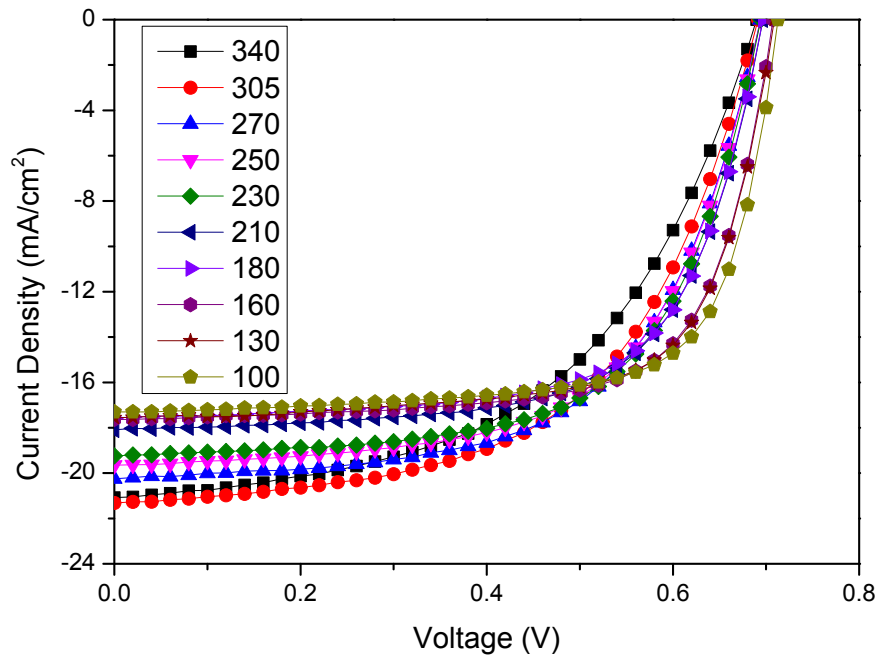

**Figure S1.** The  $J$ - $V$  curves of the P266:PC<sub>71</sub>BM-based devices with various film thickness (nm)

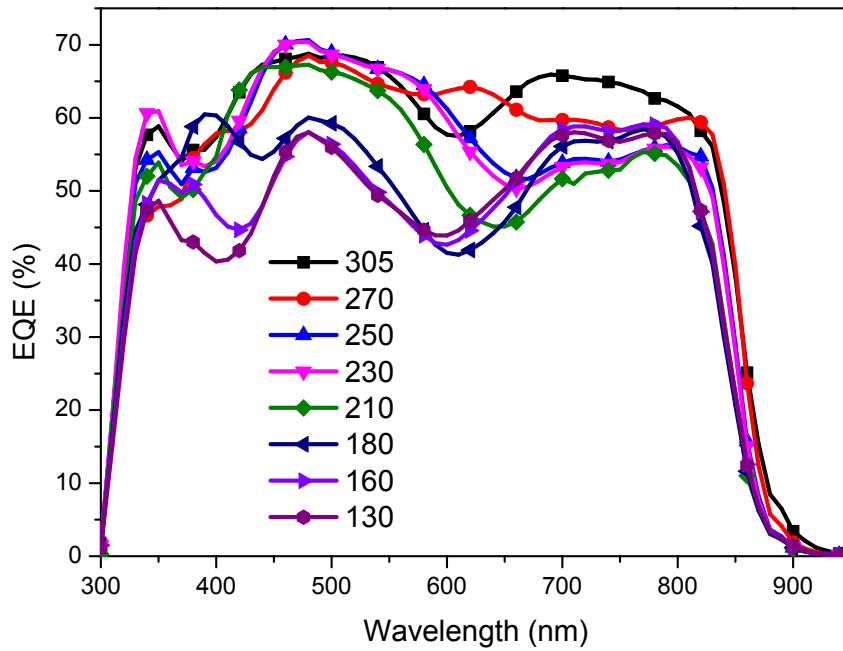

**Figure S2.** The EQE curves of the P266:PC<sub>71</sub>BM-based devices with various film thickness (nm)

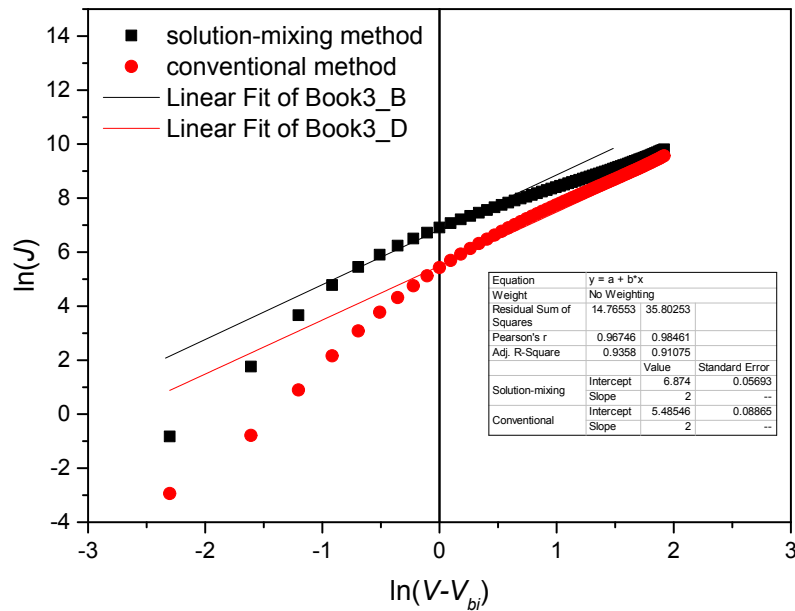

**Figure**

**Figure S3.** *J-V* Characteristics of the hole-only devices used for SCLC fitting (both films thickness are **180nm**)

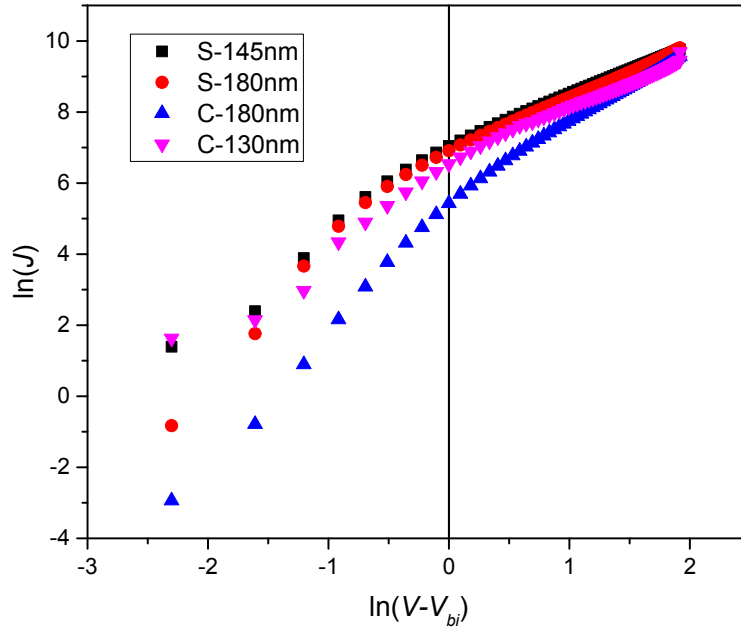

**Figure S4.**  $J$ - $V$  Characteristics of the hole-only devices of the samples prepared from slolution-mixing method (S-180nm and S-145 nm) and conventional method (C-180nm and C-130 nm).

**Table S4.** Hole mobilities calculated from devices with different film thickness.

| Thickness                  | 180nm                                                            | 145nm                                                            | 130nm                                                            |
|----------------------------|------------------------------------------------------------------|------------------------------------------------------------------|------------------------------------------------------------------|
| Solution-<br>mixing Method | $1.52 \times 10^{-3}$<br>$\text{cm}^2/(\text{V} \cdot \text{s})$ | $1.28 \times 10^{-3}$<br>$\text{cm}^2/(\text{V} \cdot \text{s})$ | --                                                               |
| Conventional<br>Method     | $2.96 \times 10^{-4}$<br>$\text{cm}^2/(\text{V} \cdot \text{s})$ | --                                                               | $3.47 \times 10^{-4}$<br>$\text{cm}^2/(\text{V} \cdot \text{s})$ |

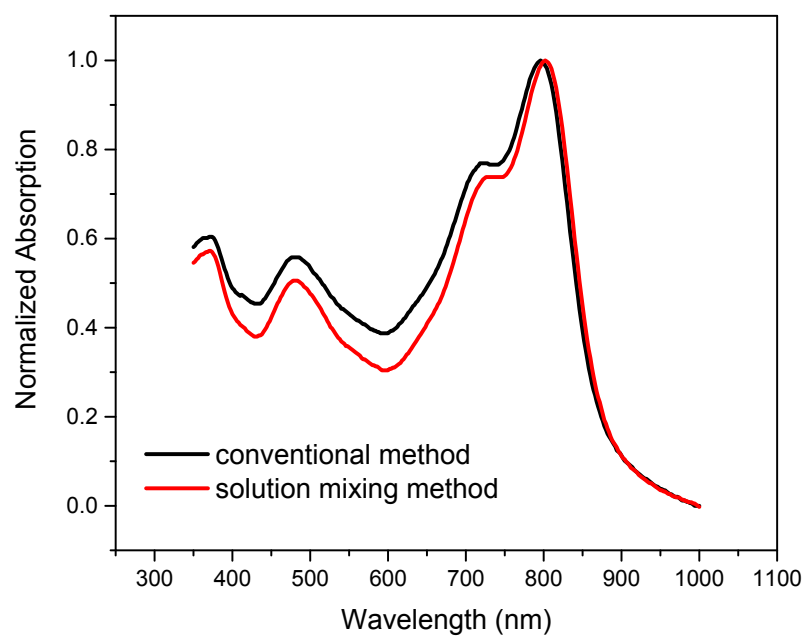

**Figure S5.** The absorption spectra of the blend film prepared by two methods.
